# Supplementary material for: Stilbocrea banihashemiana sp. nov. a New Fungal Pathogen Causing Stem Cankers and Twig Dieback of Fruit Trees
Source: MDPI journal article supplement (doi:10.3390/jof8070694), 2022-06-30
Supplement: s1 [file s1]

**Supplementary Table S1.** DNA accession numbers of *Bionectriaceae* taxa used in the phylogenetic analyses in this study.

| Taxon                             | GenBank accession number |             |             |
|-----------------------------------|--------------------------|-------------|-------------|
|                                   | ITS                      | <i>rpb2</i> | <i>tef1</i> |
| <i>Acremonium sclerotigenum</i>   | -                        | KC998999    | KC998988    |
| <i>Clonostachys buxi</i>          | KM231840                 | KM232416    | -           |
| <i>Clonostachys rosea</i>         | AF210686                 | DQ522415    | AY489611    |
| <i>Emericellopsis alkalina</i>    | KC987171                 | KC999029    | KC998993    |
| <i>Emericellopsis maritima</i>    | KC987175                 | KC999033    | KC998997    |
| <i>Emericellopsis minima</i>      | AY632660                 | KC999031    | KC998996    |
| <i>Emericellopsis pallida</i>     | AY632667                 | KC999034    | KC998998    |
| <i>Flammocладиella decora</i>     | MF611693                 | -           | -           |
| <i>Geosmithia langdonii</i>       | KF808298                 | HG799928    | HG799879    |
| <i>Geosmithia microcorthyli</i>   | MT955334                 | FM986794    | -           |
| <i>Geosmithia pallida</i>         | AJ578486                 | HG799930    | HG799871    |
| <i>Geosmithia putterillii</i>     | AJ628350                 | HG799907    | HG799853    |
| <i>Gliomastix murorum</i>         | AB540540                 | FJ238363    | -           |
| <i>Heleococcum aurantiacum</i>    | MH855645                 | JX158463    | JX158397    |
| <i>Heleococcum japonense</i>      | JX158420                 | JX158464    | JX158398    |
| <i>Hydropisphaera erubescens</i>  | MH864904                 | AY545731    | DQ522344    |
| <i>Hydropisphaera peziza</i>      | MH858575                 | DQ522444    | AY489625    |
| <i>Hypocreales</i> sp.            | GU017489                 | -           | -           |
| <i>Ijuhya dentifera</i>           | KY607540                 | -           | -           |
| <i>Lasionectria lecanodes</i>     | MH393446                 | -           | -           |
| <i>Lasionectria mantuana</i>      | HM484858                 | -           | -           |
| <i>Myrothecium inundatum</i>      | AY254152                 | -           | -           |
| <i>Nectria cinnabarina</i>        | AF163025                 | JQ014125    | AF543785    |
| <i>Nectriella atrorubra</i>       | MH863298                 | -           | -           |
| <i>Nectriopsis sporangiicola</i>  | AF210661                 | -           | -           |
| <i>Ochronectria calami</i>        | -                        | EF692515    | AY489612    |
| <i>Ochronectria thailandica</i>   | KU564071                 | -           | -           |
| <i>Peethambara sundara</i>        | KU846470                 | KU846508    | -           |
| <i>Protocreopsis freycinetiae</i> | MH861003                 | -           | -           |
| <i>Roumegueriella rufula</i>      | -                        | EF469116    | EF469070    |
| <i>Stachybotrys chartarum</i>     | KU846684                 | AY489642    | AY489609    |
| <i>Stromatonectria caraganae</i>  | MH863716                 | HQ112290    | HQ112286    |
| <i>Stilbocrea colubrensis</i>     | MN497406                 | -           | -           |
| <i>Stilbocrea gracilipes</i>      | MN497407                 | -           | -           |
| <i>Stilbocrea macrostoma</i>      | MN497404                 | EF692520    | AY489620    |
| <i>Stilbocrea walteri</i>         | MH562717                 | MH577042    | MH562714    |
| <i>Striatibotrys oleronensis</i>  | KF777192                 | -           | -           |
| <i>Striatibotrys yuccae</i>       | KU846770                 | -           | -           |
| <i>Trichonectria rectipila</i>    | MH862058                 | -           | -           |
| <i>Thyronectria rhodochlora</i>   | KJ570701                 | KJ570751    | KJ570768    |
| <i>Valsonectria pulchella</i>     | KR014357                 | -           | -           |
| <i>Valsonectria simpsonii</i>     | MH862742                 | -           | -           |

**Supplementary Table S2.** Base pair (bp) differences across ITS, *tef1*, and *rpb2* sequences showing the inter- and intraspecific variation of *Stilbocrea banihashemiana* sp. nov., and other related species, including *S. walteri* and *S. macrostoma*.

| Region      | Alignment length<br>(bp) | Differences<br><i>S. banihashemiana</i><br>/ <i>S. walteri</i> (bp) | Differences<br><i>S. banihashemiana</i><br>/ <i>S. macrostoma</i> (bp) | Differences within<br><i>S. banihashemiana</i><br>(bp) |
|-------------|--------------------------|---------------------------------------------------------------------|------------------------------------------------------------------------|--------------------------------------------------------|
| ITS         | 538                      | 15                                                                  | 87                                                                     | 0-6                                                    |
| <i>tef1</i> | 1287                     | 82                                                                  | 59                                                                     | 0-2                                                    |
| <i>rpb2</i> | 994                      | 55                                                                  | 50                                                                     | 0-1                                                    |
| Total       | 2819                     | 152                                                                 | 196                                                                    | 9                                                      |
